# Supplementary material
Source: MDPI journal article supplement (https://www.mdpi.com/2073-4344/8/9/370)
Supplement: s1 [file s1]

## Supporting Info

### Statistically Guided Synthesis of MoV-Based Mixed Oxide Catalysts for Ethane Partial

#### Oxidation

*Juan Jimenez<sup>†[a]</sup>, Kate Mingle<sup>†[a]</sup>, Teeraya Bureerug<sup>[b]</sup>, Cun Wen<sup>[a]</sup>, and Jochen Lauterbach<sup>\*[a]</sup>*

[a] Department of Chemical Engineering, University of South Carolina, Columbia, SC 29208

[b] Department of Chemistry, Mahidol University, Bangkok, Thailand, 10400

<sup>†</sup> Authors contributed equally.

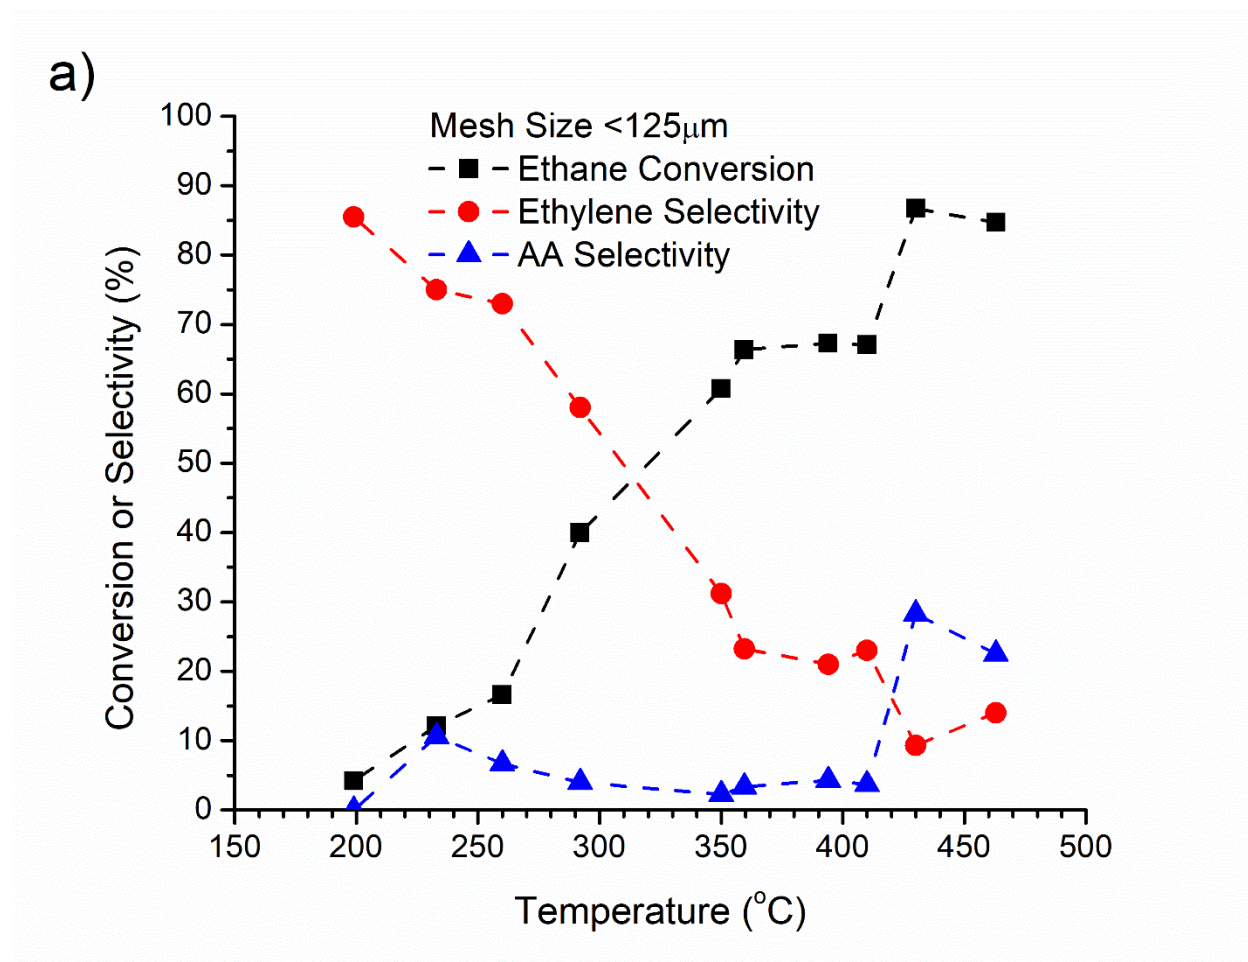

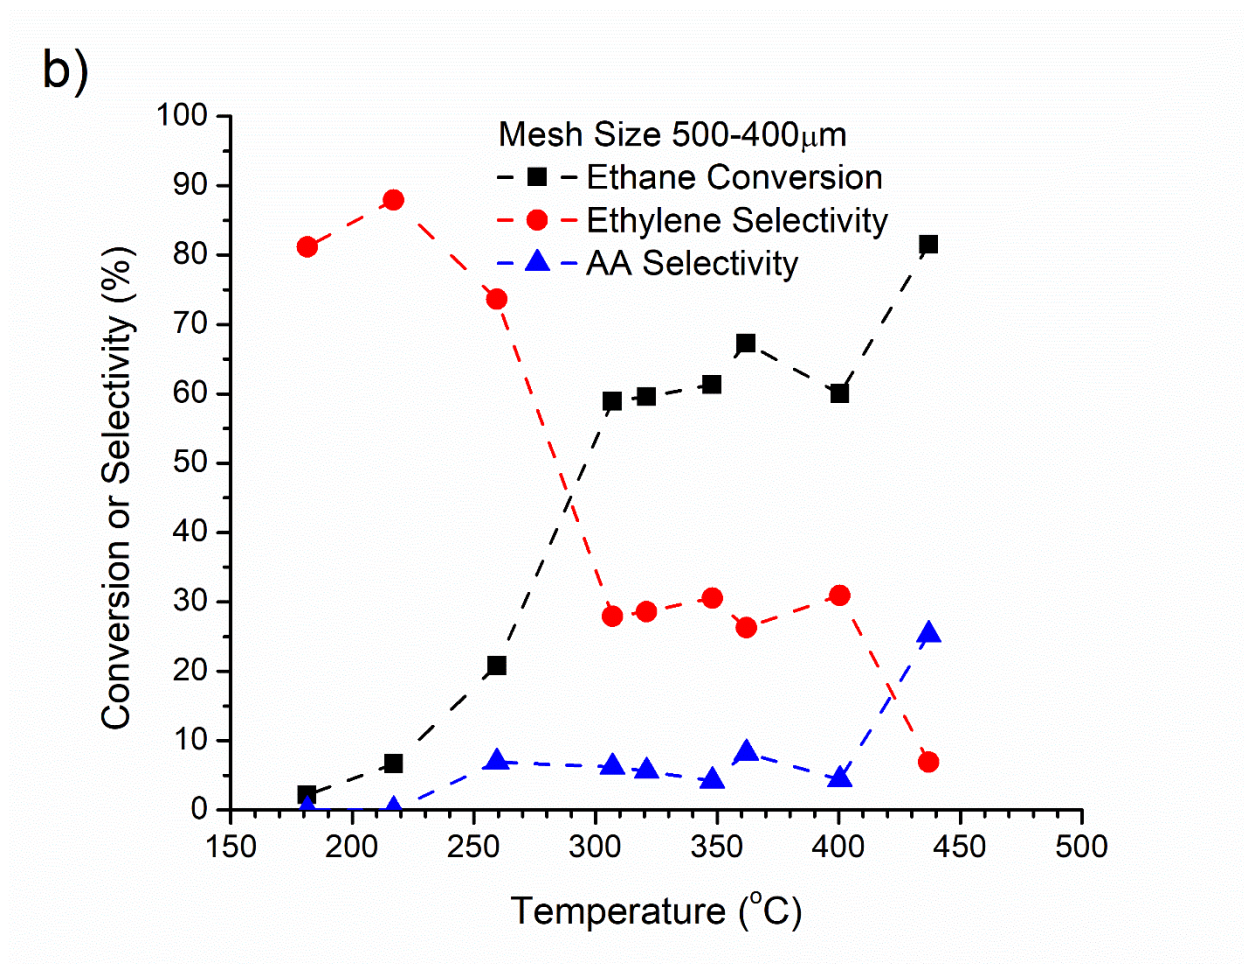

**Figure 1.** Selected reproducibility studies on (a) <125  $\mu$ m, and b) 500-400  $\mu$ m mesh sizes.

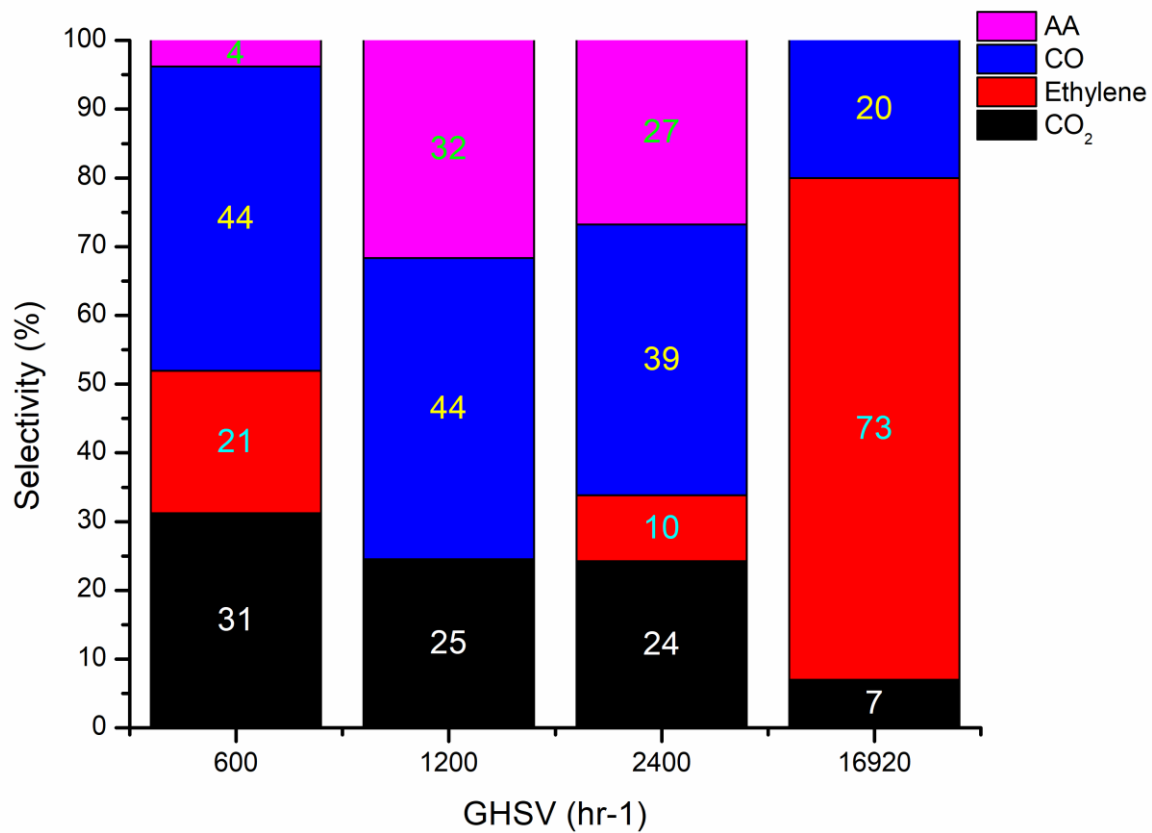

Figure 2. Product distribution at varied GHSV for base MoVNb.

**Table 1.** MoVNb<sub>(H=1)</sub>[R<sub>R</sub>A<sub>A</sub>]<sub>D</sub> Catalyst Formulation Standard Orders

|                        | PdK | PdCs | PdTe | NiK | NiCs | NiTe | TiK | TiCs | TiK |
|------------------------|-----|------|------|-----|------|------|-----|------|-----|
| R/A=0.005<br>D/H=0.005 | 1   | 10   | 19   | 28  | 37   | 46   | 55  | 64   | 73  |
| R/A=0.005<br>D/H=0.5   | 2   | 11   | 20   | 29  | 38   | 47   | 56  | 65   | 74  |
| R/A=0.005<br>D/H=1     | 3   | 12   | 21   | 30  | 39   | 48   | 57  | 66   | 75  |
| R/A=0.5<br>D/H=0.005   | 4   | 13   | 22   | 31  | 40   | 49   | 58  | 67   | 76  |
| R/A=0.5<br>D/H=0.5     | 5   | 14   | 23   | 32  | 41   | 50   | 59  | 68   | 77  |
| R/A=0.5<br>D/H=1       | 6   | 15   | 24   | 33  | 42   | 51   | 60  | 69   | 78  |
| R/A=1<br>D/H=0.005     | 7   | 16   | 25   | 34  | 43   | 52   | 61  | 70   | 79  |
| R/A=1<br>D/H=0.5       | 8   | 17   | 26   | 35  | 44   | 53   | 62  | 71   | 80  |
| R/A=1<br>D/H=1         | 9   | 18   | 27   | 36  | 45   | 54   | 63  | 72   | 81  |

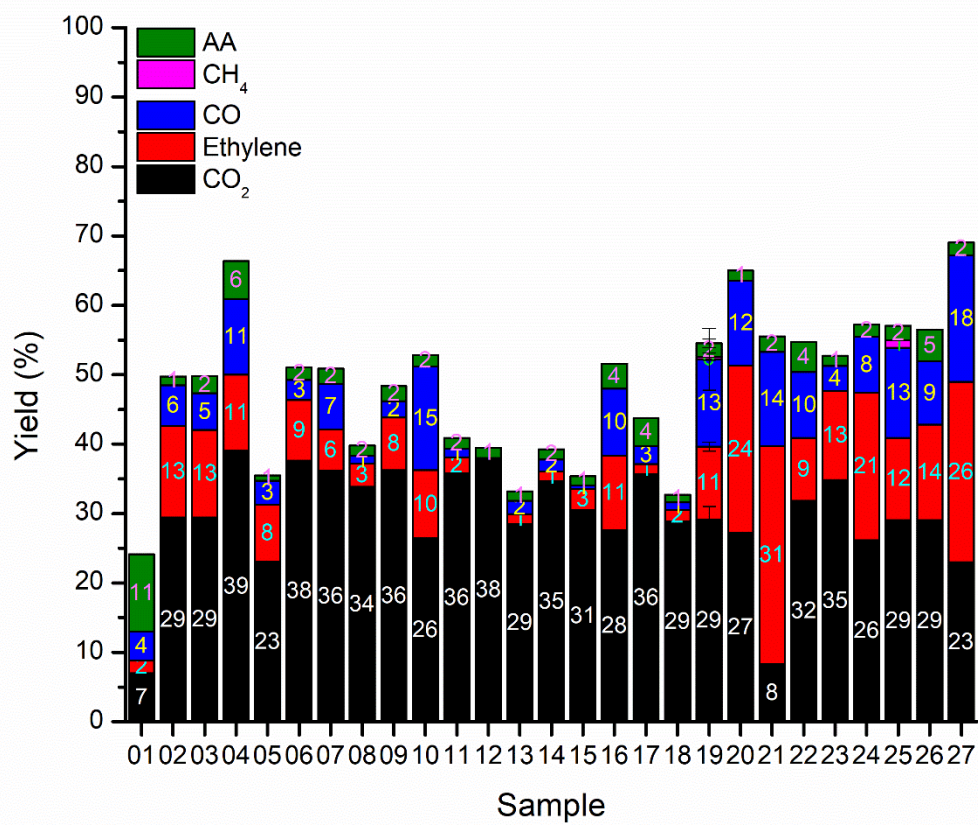

Figure 3. Product distribution at 450 °C for Pd-doped MoVNb.



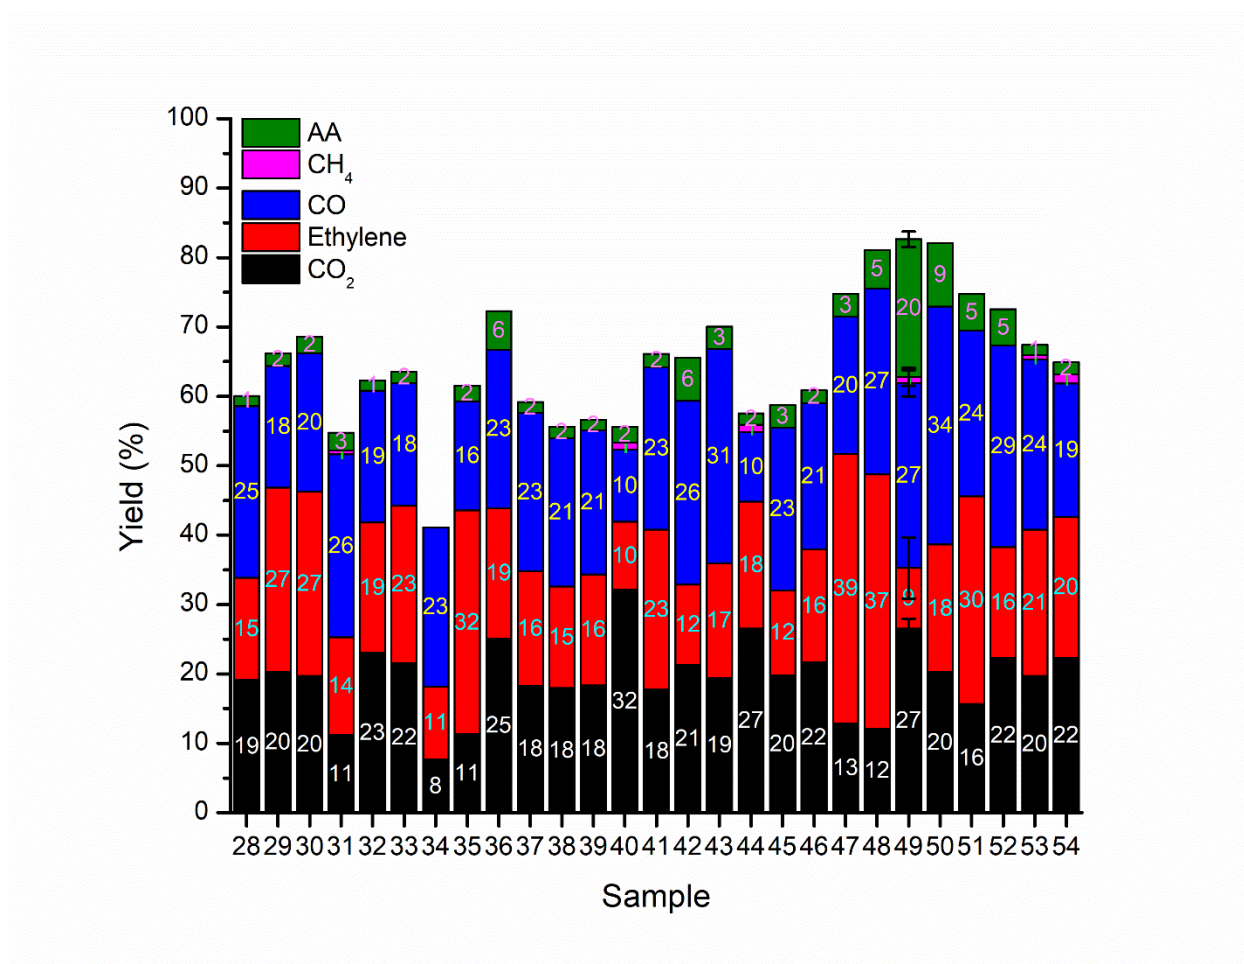

**Figure 4.** Product distribution at 450 °C for Ni-doped MoVNb.

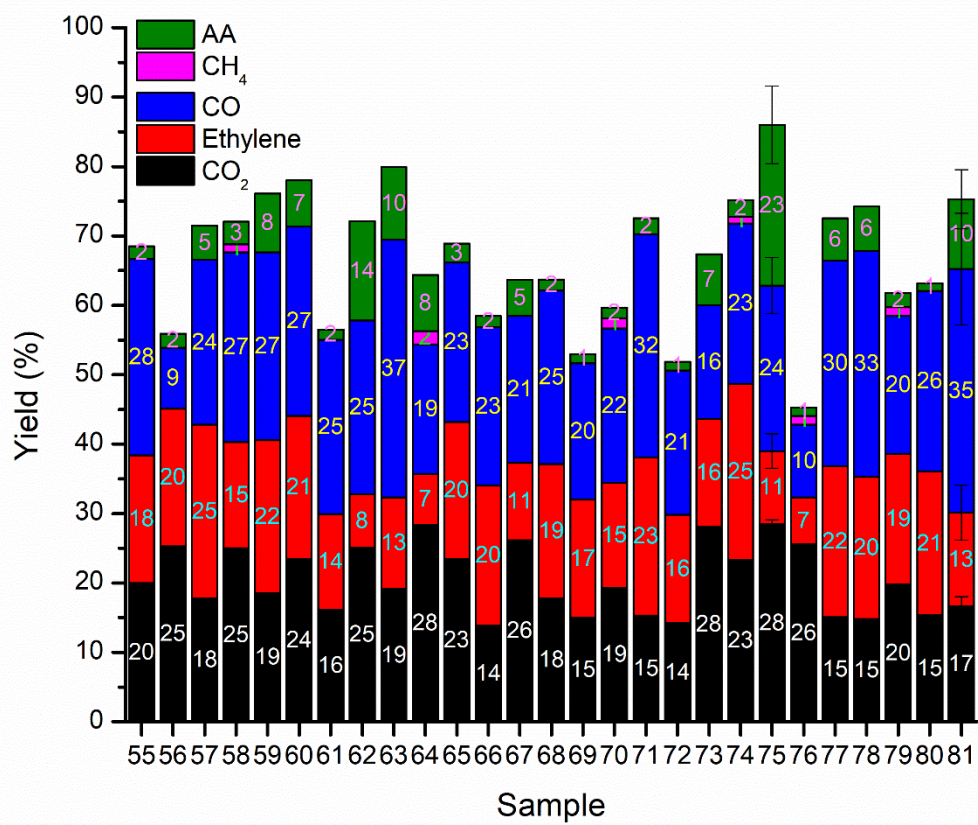

**Figure 5.** Product distribution at 450 °C for Ti-doped MoVNb.
